# Supplementary material for: Organic contaminants and atmospheric nitrogen at the graphene–water interface: a simulation study
Source: Royal Society of Chemistry journal article supplement (doi:10.1039/d1na00570g), 2022-01-01
Supplement: d1na00570g1.pdf [file d1na00570g1.pdf]

*Supplementary Information for*  
**Organic contaminants and atmospheric nitrogen at the graphene–water interface: A simulation study**

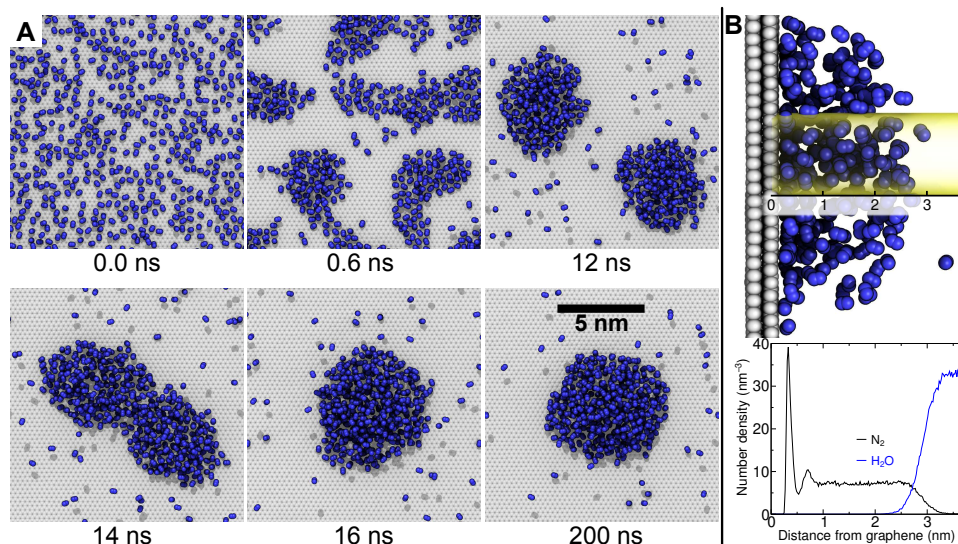

**Figure S1:** Spontaneous formation of dense bubble-like aggregates of N<sub>2</sub> at the graphene–water interface. **(A)** The simulation began with N<sub>2</sub> molecules distributed across the graphene surface at a density of 3.7 molecules/nm<sup>2</sup> and was evolved for 200 ns. Snapshots of the simulation are shown for several different times. Interatomic forces between N<sub>2</sub>, water, and graphene were those of Peng et al.<sup>1</sup> (Peng-SPCE). For clarity, water molecules are not shown. **(B)** Number density of N<sub>2</sub> and water as a function of distance from the graphene surface for a region (translucent yellow cylinder) of the aggregate near its center. The density profile of these aggregates appears quite similar to that reported by Peng et al.<sup>1</sup> for their dense gas layers.

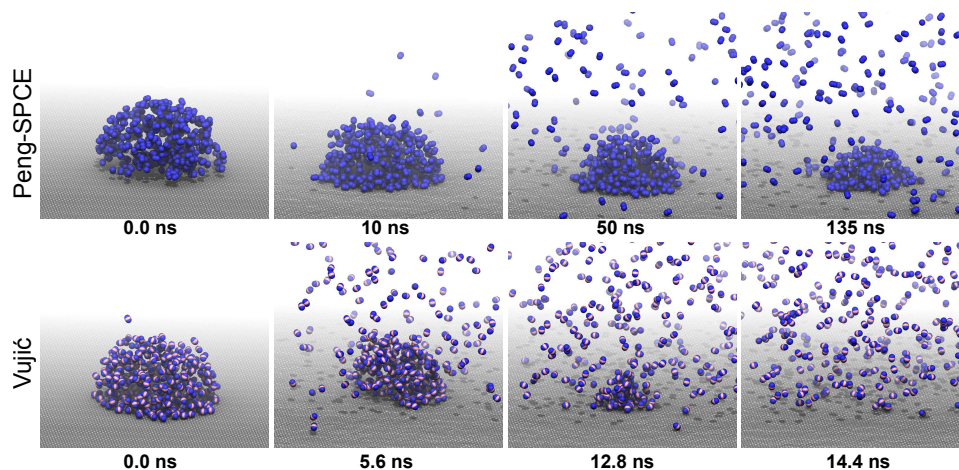

**Figure S2:** Evolution of hemispherical aggregates of  $N_2$  at the graphene–water interface with supersaturated  $N_2$  for two sets of force field parameters: the Peng-SPCE model<sup>1</sup> (top) and the Vujić model.<sup>2</sup>

**Table S1:** Free energy to form adsorbate–adsorbate pairs at the graphene–water interface and calculation of a wetting parameter ( $\Delta A_{\text{aq}\rightarrow\text{ads}}/\Delta A_{\text{pair}}$ ).

| molecule           | $\Delta A_{\text{aq}\rightarrow\text{ads}}$<br>(kcal/mol) | $\Delta A_{\text{pair}}$<br>(kcal/mol) | $\frac{\Delta A_{\text{aq}\rightarrow\text{ads}}}{\Delta A_{\text{pair}}}$ |
|--------------------|-----------------------------------------------------------|----------------------------------------|----------------------------------------------------------------------------|
| $N_2$              | −1.11                                                     | −1.02                                  | 1.1                                                                        |
| hexane             | −4.76                                                     | −2.47                                  | 1.9                                                                        |
| octane             | −6.12                                                     | −3.75                                  | 1.6                                                                        |
| decane             | −7.84                                                     | −5.06                                  | 1.5                                                                        |
| dodecane           | −9.29                                                     | −6.58                                  | 1.4                                                                        |
| pentadecane        | −11.64                                                    | −8.81                                  | 1.3                                                                        |
| hexadecane         | −12.10                                                    | −9.28                                  | 1.3                                                                        |
| octadecane         | −14.34                                                    | −10.74                                 | 1.3                                                                        |
| 2-methylheptane    | −6.07                                                     | −3.12                                  | 1.9                                                                        |
| isooctane          | −4.87                                                     | −2.01                                  | 2.4                                                                        |
| 7-ethyltetradecane | −11.40                                                    | −4.59                                  | 2.5                                                                        |
| ethanol            | −2.22                                                     | −0.58                                  | 3.8                                                                        |
| toluene            | −5.07                                                     | −1.25                                  | 4.0                                                                        |
| limonene           | −6.87                                                     | −1.99                                  | 3.5                                                                        |
| $N_2$ (no water)   | −2.04                                                     | −0.18                                  | 11.4                                                                       |
| octane (no water)  | −11.80                                                    | −1.01                                  | 11.7                                                                       |

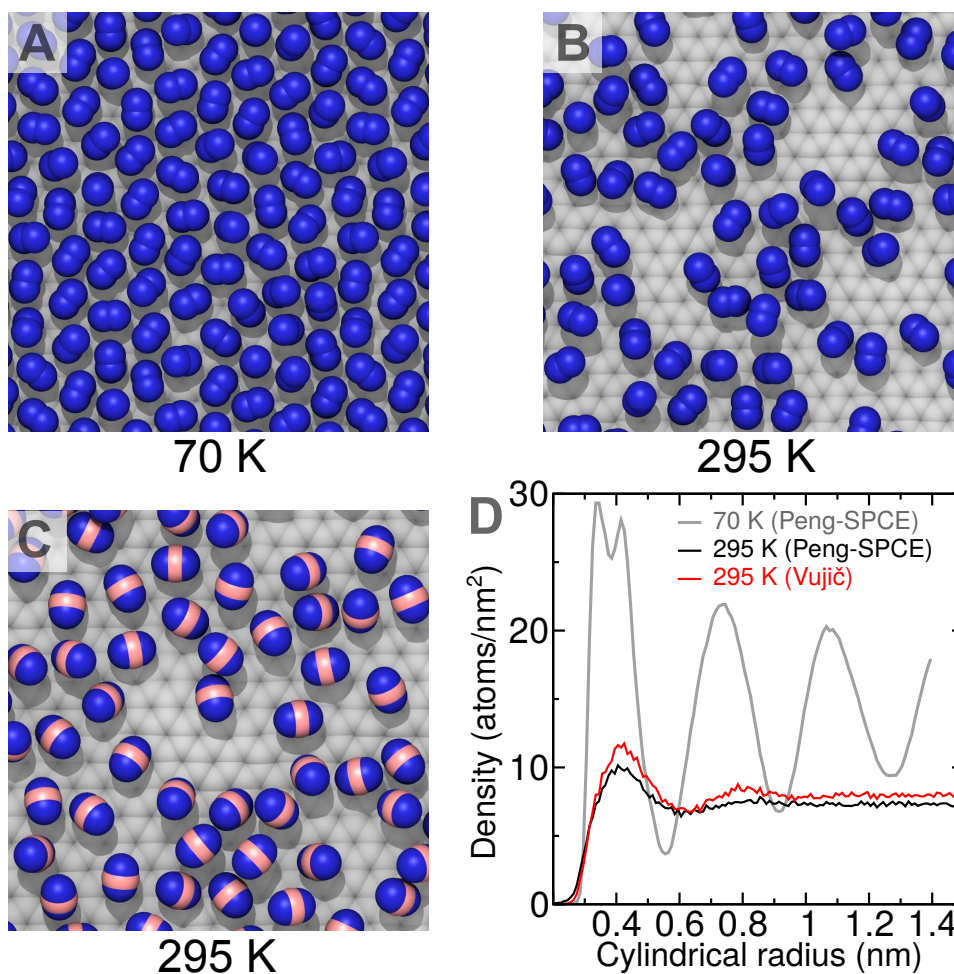

**Figure S3:** Configurations of N<sub>2</sub> molecules on graphene. (A) Ordered arrangement of N<sub>2</sub> molecules at an interface between liquid N<sub>2</sub> and graphene at 70 K in a simulation using the Peng-SPCE model. (B–C) Disordered arrangement of N<sub>2</sub> molecules at the graphene–water interface at room temperature in simulations using the Peng-SPCE (B) or Vujić (C) models. (D) Cylindrical distribution function for the first layer N<sub>2</sub> molecules on the graphene surface.

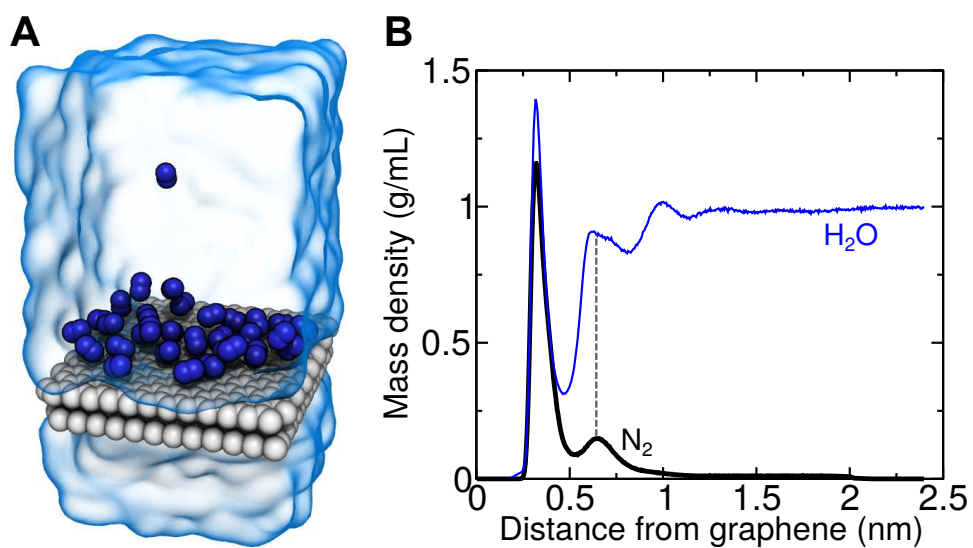

**Figure S4:** Density profile of N<sub>2</sub> at the graphene–water interface showing no sign of N<sub>2</sub> occupying the low density region between water layers. **(A)** Simulation snapshot of a thin N<sub>2</sub> layer atop a patch of graphene in water. **(B)** Density profile of N<sub>2</sub> and water along the axis perpendicular to the graphene surface.

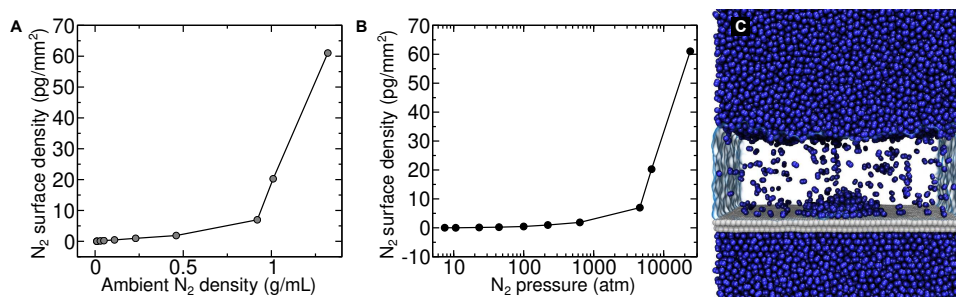

**Figure S5:** Simulations to determine the ambient N<sub>2</sub> concentration required to stabilize dense N<sub>2</sub> aggregates at the graphene–water interface. **(A)** Areal mass density of N<sub>2</sub> in the first solvation layer (less than 0.5 nm from the graphene sheet) as a function of the ambient volumetric mass density of the N<sub>2</sub> phase. The values are calculated after 120 ns of equilibration. The N<sub>2</sub> aggregate initially at the graphene–water interface dissipates before 120 ns in all simulations except for the one at the highest ambient N<sub>2</sub> density. It appears stable in the latter simulation. **(B)** Areal mass density of N<sub>2</sub> in the first solvation layer as a function of the system pressure. The pressure required to stabilize the aggregate exceeds the pressure at which N<sub>2</sub> is fluid, so the validity of the highest pressure simulation is questionable. **(C)** Cross section of a simulation in which the N<sub>2</sub> aggregate appears stable. Nitrogen and graphene carbon atoms are shown, respectively, as blue and gray spheres. For clarity, explicit water molecules are not shown, but represented by a transparent cyan surface.

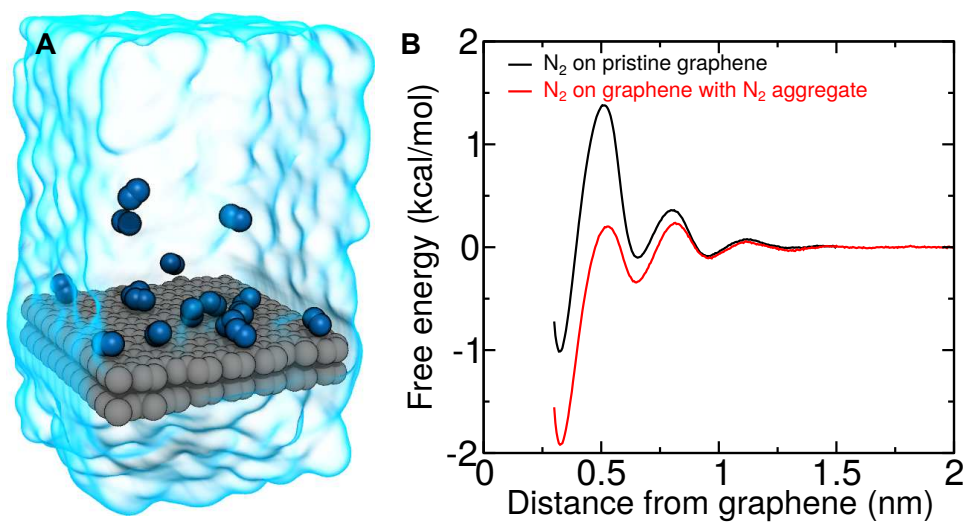

**Figure S6:** Cooperative effects in adsorption of the N<sub>2</sub> to the graphene–water interface. Binding an additional N<sub>2</sub> molecule becomes somewhat more favorable when the interface is already occupied by N<sub>2</sub>. **(A)** Simulation system used for the calculation. **(B)** Potential of mean force on a single N<sub>2</sub> molecule as a function of distance from the upper layer of graphene for a pristine graphene–water interface or for one already occupied by an N<sub>2</sub> aggregate.

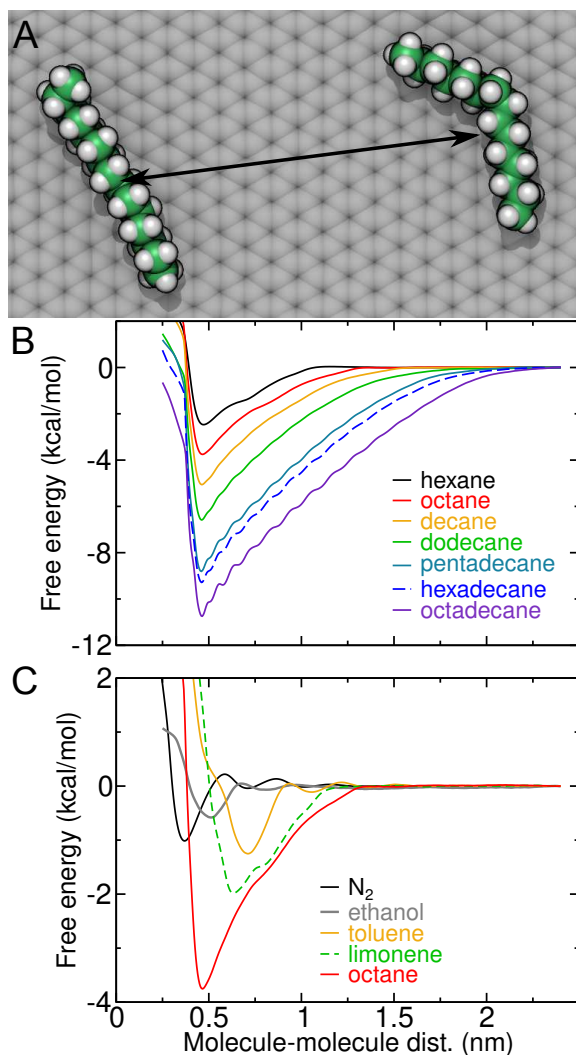

**Figure S7:** Free energy of pair formation at the graphene–water interface. **(A)** Image of two pentadecane molecules at the graphene–water interface. The transition coordinate for the free energy calculations is  $\rho = \sqrt{(x_1 - x_2)^2 + (y_1 - y_2)^2}$  the distance between the centers of mass of the two molecules projected into the  $xy$  plane (the plane parallel to the graphene surface). **(B)** Free energy as a function of  $\rho$  for a series of alkanes. The geometric (Jacobian) contribution to the free energy has been removed. **(C)** Free energy as a function of  $\rho$  for other VOCs. Octane is included for reference.

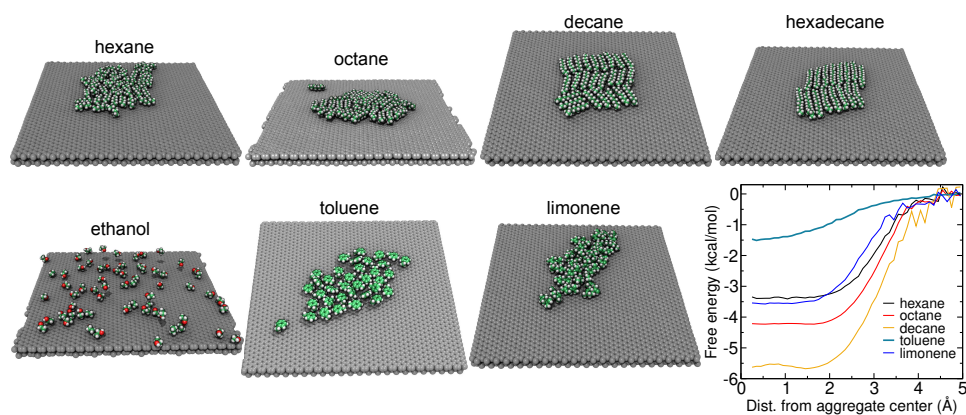

**Figure S8:** Configuration of aggregates of 42 hexane, 32 octane, 25 decane, 16 hexadecane, 85 ethanol, 36 toluene, and 25 limonene molecules at the graphene–water interface. (bottom-right) Free energy as a function of distance from the aggregate center calculated by  $-k_{\text{B}}T \ln(h(\rho)) + k_{\text{B}}T \ln(2\pi\rho)$ , where  $h(\rho)$  is a histogram of the cylindrical radial coordinate ( $\rho = \sqrt{x^2 + y^2}$ ) of the molecules relative to the center of the aggregate and the second term removes geometric (Jacobian) contribution to the free energy.



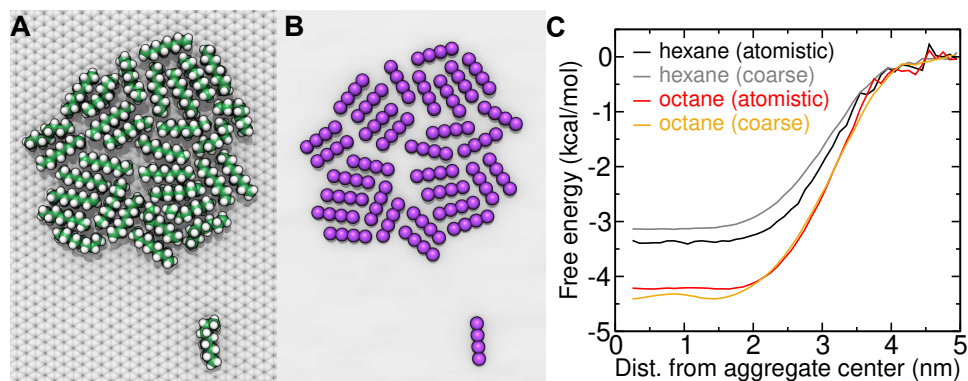

**Figure S9:** Coarse-grain model of straight-chain alkanes at the graphene–water interface. **(A)** All-atom representation of octane aggregate at the graphene–water interface. Explicit water molecules are not shown. **(B)** Coarse-grain model of the same octane aggregate. The coarse-grain model does not include explicit solvent, but is explicitly constructed to reproduce the free energy of transfer from the gas phase to isolated adsorbed phase ( $\Delta A_{\text{gas}\rightarrow\text{aq}} + \Delta A_{\text{aq}\rightarrow\text{ads}}$ ) as calculated in the all-atom simulations. Each bead represents two carbon atoms. **(C)** Bead–bead interactions were calibrated so that the distribution of adsorbate molecules (hexane or octane) relative to the center of mass of the aggregate agreed decently between the all-atom and coarse-grain models. Fifty different bead–bead interaction parameters were tried and the best performing one ( $\epsilon_{\text{bead}} = 0.86$  kcal/mol and  $\epsilon_{\text{bead}} = 3.795$  Å), whose results are graphed in this panel, was used for the GCMC calculations.

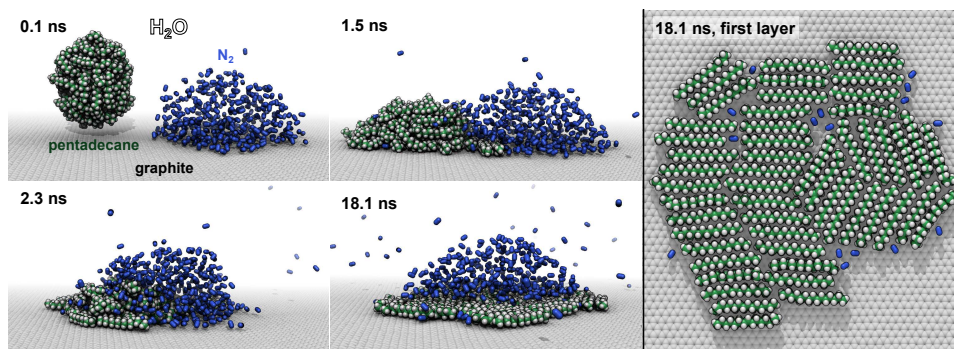

**Figure S10:** Simulation of a pentadecane droplet in water near an  $N_2$  aggregate at the graphene–water interface under supersaturated conditions. The right panel is a cross section showing only the  $N_2$  nearest the graphene surface. As might be expected from the favorable  $\Delta A_{\text{aq} \rightarrow \text{ads}}$  of heavy alkanes compared to  $N_2$ , we found that they displace  $N_2$  from the graphene–water interface. A droplet of pentadecane released near an  $N_2$  aggregate eventually merges with it.

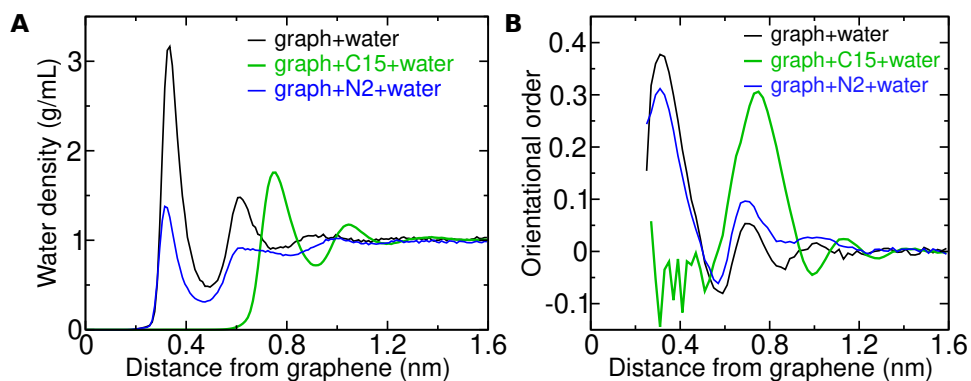

**Figure S11:** Water structure at graphene–water interfaces. **(A)** Mass density of water as a function of distance from the graphene sheet for a pristine graphene–water interface, a graphene–water interface occupied by a complete pentadecane monolayer, and a graphene–water interface with an  $N_2$  aggregate (supersaturated solution of  $N_2$ ). The density of water in the first solvation layer at the pristine graphene–water interface is more than triple that in bulk water. The density of water is also enhanced on top of the pentadecane monolayer, but the magnitude is considerably less. **(B)** Orientational order parameter  $\frac{1}{2}(3 \cos^2 \theta - 1)$  of water molecules at these graphene–water interfaces. Here,  $\theta$  is the angle between the  $z$ -axis (perpendicular to the graphene sheet) and the normal to the plane going through the centers of a water molecule’s atoms. Near the graphene–water interface, the plane of each water molecule tends to align parallel to the plane of the graphene.

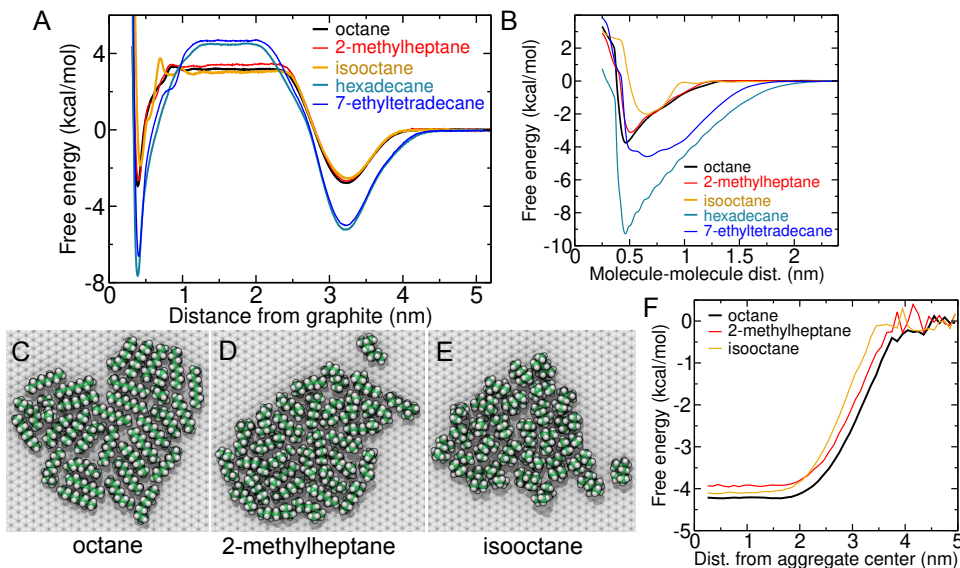

**Figure S12:** Comparison of adsorption thermodynamics of branched and straight-chain alkanes. Straight-chain octane is compared to 8-carbon isomers 2-methylheptane and isooctane (2,2,4-trimethylpentane). **(A)** Free energy for transfer from the gas phase, through the aqueous phase, to the graphene–water interface. Branched alkanes exhibit less favorable adsorption. **(B)** Free energy for forming pairs of adsorbed alkanes at the graphene–water interface. The free energy is calculated as a function of the cylindrical radial distance ( $\rho = \sqrt{(x_1 - x_2)^2 + (y_1 - y_2)^2}$ ). The geometric (Jacobian) term ( $-kT \ln(2\pi\rho)$ ) has been removed so that the free energy plateaus at large distances. The formation of pairs is considerably less favorable for branched isomers as compared to their straight-chain congeners. **(C–E)** Dense monolayer aggregates formed from octane isomers at the graphene–water interface. Greater amounts of branching lead to more disordered aggregates. **(F)** Free energy as a function of distance from the aggregate center calculated by  $-k_B T \ln[h(\rho)] + k_B T \ln[2\pi\rho]$ , where  $h(\rho)$  is a histogram of cylindrical radial coordinate of the molecules relative to the center of mass of the aggregate and the second term removes geometric (Jacobian) contribution to the free energy. While the free energy for joining the aggregate is less favorable for the branched octane isomers than for *n*-octane, the difference is not as dramatic as for forming pairs.

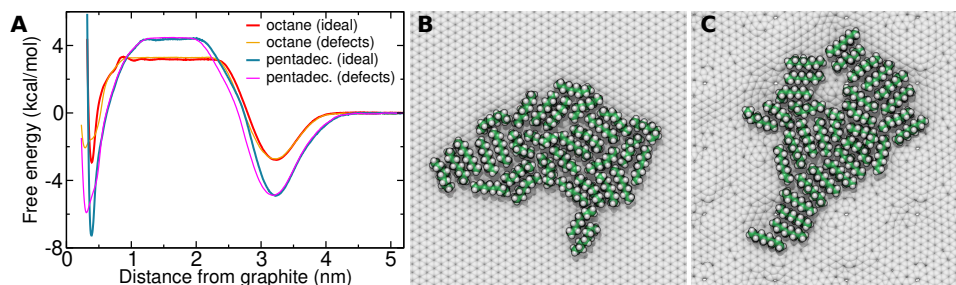

**Figure S13:** Effect of graphene defects on adsorption at the graphene–water interface. **(A)** Free energy for transfer from the gas phase to the aqueous phase to graphene–water interfaces with ideal structure and with a defect-rich structure (61:10:8:1 ratio of 6, 5, 7, and 8-membered carbon rings). The defects create undulations that broaden the free energy minima, but result in an overall reduction in the adsorption affinity. **(B)** Snapshot from a simulation of an octane aggregate at the graphene–water interface for ideal graphene. **(C)** Snapshot from a simulation of an octane aggregate at the graphene–water interface for a defect-rich graphene sheet. The octane molecules prefer concave regions and spend less time in convex regions.

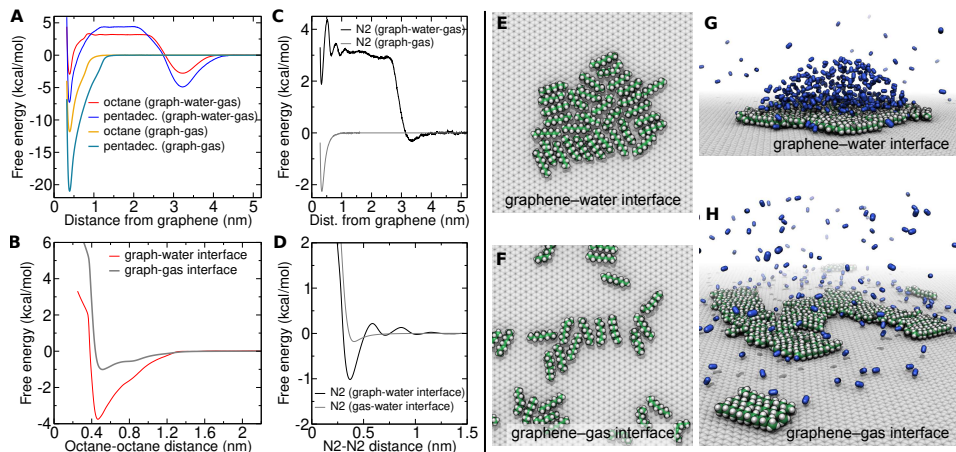

**Figure S14:** Comparison of adsorption at the graphene–water and graphene–gas interfaces. **(A)** Free energy for transfer from the gas phase to the graphene–water interface or the graphene–gas interface for alkanes. The latter is significantly more favorable. **(B)** Free energy for octane–octane pairs at the graphene–water and graphene–gas interfaces. Pairing is much less favorable at the graphene–gas interface than at the graphene–water interface. **(C)** Free energy for transfer from the gas phase to the graphene–water interface or the graphene–gas interface for N<sub>2</sub>. **(D)** Free energy for N<sub>2</sub>–N<sub>2</sub> pairs at the graphene–water and graphene–gas interfaces. **(E–F)** Comparison of octane aggregates at the graphene–water and graphene–gas interfaces. The cohesion of the aggregates is much greater in the presence of water than in its absence. **(G)** N<sub>2</sub> aggregate atop a pentadecane monolayer at the graphene–water interface. **(H)** Same system as panel G except in the absence of water. The pentadecane aggregate is much less compact and no aggregation of N<sub>2</sub> is apparent.

## References

1. H. Peng, G. R. Birkett and A. V. Nguyen, *Langmuir*, 2013, **29**, 15266–15274.
2. B. Vujić and A. P. Lyubartsev, *Model. Simul. Mater. Sc.*, 2016, **24**, 045002.
